# Supplementary material for: Effects of long-term nitrogen & phosphorus fertilization on soil microbial, bacterial and fungi respiration and their temperature sensitivity on the Qinghai-Tibet Plateau
Source: PeerJ. 2022 Feb 24;10:e12851. doi: 10.7717/peerj.12851 (PMC8882332; doi:10.7717/peerj.12851)
Supplement: Supplemental Information 3 [file peerj-10-12851-s003.xlsx]

## Sheet: Respiration
	RM15	RM25	RM35	RB15	RB25	RB35	RF15	RF25	RF35	Belowground biomass	TOC	TN	C:N	TP	pH	DOC	DON	NO3	NH4	SOC complexity
CK	17.1049	16.1262	17.1968	6.94472	3.00932	0.0172259	9.07154	9.86253	10.0725	4.7464	102.022	4.51649	22.5889	0.724369	6.72	110.12	33.5189	37.2487	23.304	0.663886
CK	12.3421	13.5585	11.9374	2.58719	6.53086	0.000917643	4.54702	7.23738	4.78351	7.0421	95.1504	2.95573	32.1918	0.849221	7.3	147.76	18.9666	14.7868	14.5633	0.67467
CK	13.1975	14.8037	17.1091	1.83308	4.00065	0.0774362	5.55862	8.90211	9.33765	6.5771	96.6476	3.7263	25.9366	0.726103	6.93	83.48	22.6031	32.0605	24.3276	0.655686
CK	12.9715	14.4416	16.804	6.16644	2.32488	0.0199628	7.16412	8.74093	10.516	9.5767	99.1639	3.32573	29.8172	0.696277	7.25	239.88	22.5625	25.5809	17.7742	0.706413
N	5.07251	11.6222	8.59177	0.508537	2.96295	0.015117	0.805469	6.89074	1.82976	10.3411	99.305	4.15545	23.8975	0.683958	6.35	243.04	43.6853	22.3684	18.9762	0.705515
N	4.34152	11.0504	8.44689	0.81009	0.293646	0.0787724	1.17589	6.61918	0.976212	14.2822	93.3311	4.00763	23.2883	0.805414	6.28	149.44	16.4831	40.4061	20.4732	0.697456
N	5.62626	5.65434	9.14519	0.753864	0.448196	0.0466066	2.51686	2.81944	0.548026	13.7678	101.182	4.02045	25.1668	0.600924	6.07	129.76	75.604	48.1244	18.3583	0.739591
N	8.1721	6.90399	9.27348	2.87732	3.21927	0.658771	3.99445	4.45321	1.34593	3.8055	86.7622	3.17046	27.3658	0.600638	7.73	166.16	24.1777	51.0247	13.8631	0.786142
P	8.68159	12.4612	14.521	2.55703	1.72434	0.058214	4.6476	7.05633	6.55283	4.9798	124.536	4.09443	30.4159	1.43961	6.46	42.24	30.8351	22.4286	25.8776	0.726958
P	7.74812	11.6531	13.2505	2.01831	0.28795	0.396486	3.73525	7.03168	4.92032	3.5841	89.4414	3.51464	25.4482	1.48004	7.41	29.08	21.9533	32.2409	11.5146	0.794632
P	21.9552	17.2434	15.5351	4.76429	6.68591	0.133412	15.9647	9.81872	7.31315	7.714	97.3539	3.36074	28.968	1.50766	7.19	53.72	38.8052	20.2381	12.7425	0.727022
P	7.07075	17.0293	12.4814	2.87786	3.59208	1.24799	4.14761	11.6761	4.59461	4.2807	95.7608	3.61418	26.4959	1.66898	7.42	44.64	45.0812	19.5671	16.6667	0.731655
NP	4.14312	11.8121	6.55679	1.33267	1.3203	0.0627539	2.13986	3.05348	2.53101	9.0358	99.6076	3.85882	25.813	1.38846	5.05	75.28	61.9391	60.0448	20.6054	0.67394
NP	6.24629	4.0139	8.66489	0.797031	0.0287022	2.54396	0.635611	2.64723	3.32977	8.9777	97.088	3.28799	29.5281	1.4067	6.79	40.96	22.5126	28.9017	14.9566	0.779111
NP	6.14252	12.523	7.69373	0.405347	2.48164	0.0348704	3.017	8.00351	0.979657	7.5923	109.042	4.70246	23.1883	1.50754	6.15	50.08	35.3278	51.1592	13.1142	0.777911
NP	3.20405	9.53356	6.03858	0.594295	2.65606	1.60507	1.38919	7.0188	4.55051	9.2476	93.841	3.66897	25.577	0.999291	6.87	61.48	26.6897	55.5602	16.473	0.781719

## Sheet: Soil properties
	Belowground biomass	TOC	TN	C:N	TP	pH	DOC	DON	NO3	NH4	SOC complexity
CK	4.7464	102.022	4.51649	22.5889	0.724369	6.72	110.12	33.5189	37.2487	23.304	0.663886
CK	7.0421	95.1504	2.95573	32.1918	0.849221	7.3	147.76	18.9666	14.7868	14.5633	0.67467
CK	6.5771	96.6476	3.7263	25.9366	0.726103	6.93	83.48	22.6031	32.0605	24.3276	0.655686
CK	9.5767	99.1639	3.32573	29.8172	0.696277	7.25	239.88	22.5625	25.5809	17.7742	0.706413
N	10.3411	99.305	4.15545	23.8975	0.683958	6.35	243.04	43.6853	22.3684	18.9762	0.705515
N	14.2822	93.3311	4.00763	23.2883	0.805414	6.28	149.44	16.4831	40.4061	20.4732	0.697456
N	13.7678	101.182	4.02045	25.1668	0.600924	6.07	129.76	75.604	48.1244	18.3583	0.739591
N	3.8055	86.7622	3.17046	27.3658	0.600638	7.73	166.16	24.1777	51.0247	13.8631	0.786142
P	4.9798	124.536	4.09443	30.4159	1.43961	6.46	42.24	30.8351	22.4286	25.8776	0.726958
P	3.5841	89.4414	3.51464	25.4482	1.48004	7.41	29.08	21.9533	32.2409	11.5146	0.794632
P	7.714	97.3539	3.36074	28.968	1.50766	7.19	53.72	38.8052	20.2381	12.7425	0.727022
P	4.2807	95.7608	3.61418	26.4959	1.66898	7.42	44.64	45.0812	19.5671	16.6667	0.731655
NP	9.0358	99.6076	3.85882	25.813	1.38846	5.05	75.28	61.9391	60.0448	20.6054	0.67394
NP	8.9777	97.088	3.28799	29.5281	1.4067	6.79	40.96	22.5126	28.9017	14.9566	0.779111
NP	7.5923	109.042	4.70246	23.1883	1.50754	6.15	50.08	35.3278	51.1592	13.1142	0.777911
NP	9.2476	93.841	3.66897	25.577	0.999291	6.87	61.48	26.6897	55.5602	16.473	0.781719
